# Supplementary material for: Slurry Homopolymerization of Ethylene Using Thermostable α-Diimine Nickel Catalysts Covalently Linked to Silica Supports via Substituents on Acenaphthequinone-Backbone
Source: MDPI journal article supplement (doi:10.3390/polym14173684), 2022-09-05
Supplement: s1 [file s1]

## Electronic Supplementary Information

### **Slurry polymerization of ethylene using thermostable $\alpha$ -diimine nickel catalysts covalently linked to silica via substituents on acenaphthequinone-backbone**

Kening Zong, Yanhui Hou, Xiaobei Zhao, Yali Sun, Binyuan Liu and Min Yang

#### **Table of Contents**

|                                             |    |
|---------------------------------------------|----|
| GPC curves of polyethylene                  | S2 |
| DSC curves of polyethylene                  | S3 |
| <sup>13</sup> C NMR spectra of polyethylene | S6 |

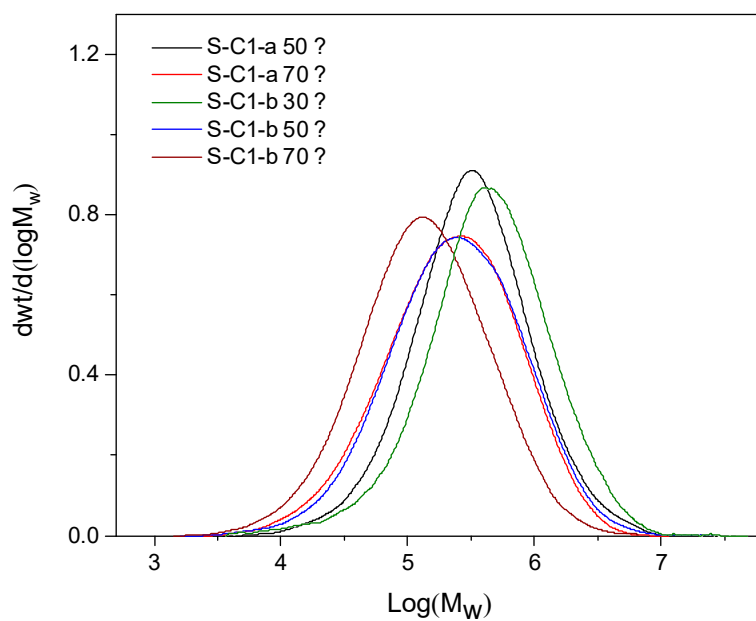

**Figure S1. GPC curves of polyethylene obtained with S-C1-a/b (Entries 2, 3, 5, 6, 7 in Table 2)**

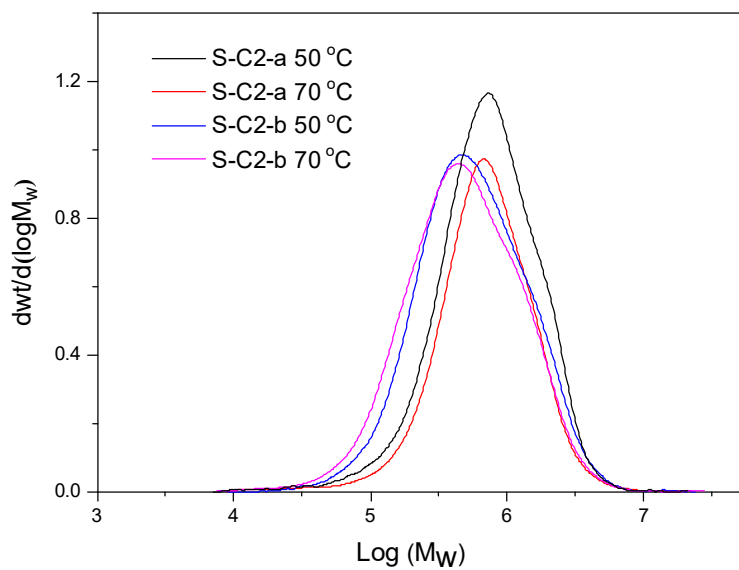

**Figure S2. GPC curves of polyethylene obtained with S-C2-a/b (Entries 9, 10, 13, 14 in Table 2)**

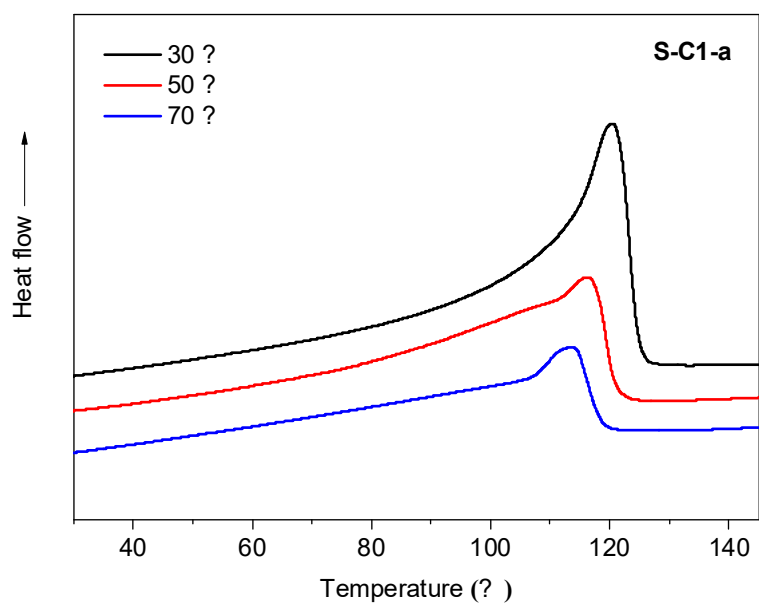

**Figure S3. DSC curves of polyethylene obtained with S-C1-a (Entries 1- 3 in Table 2)**

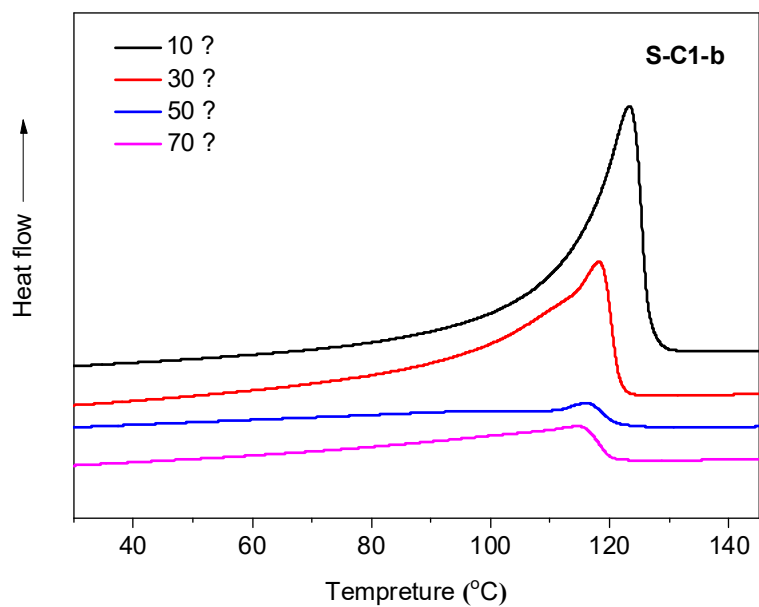

**Figure S4. DSC curves of polyethylene obtained with S-C1-b (Entries 4-7 in Table 2)**

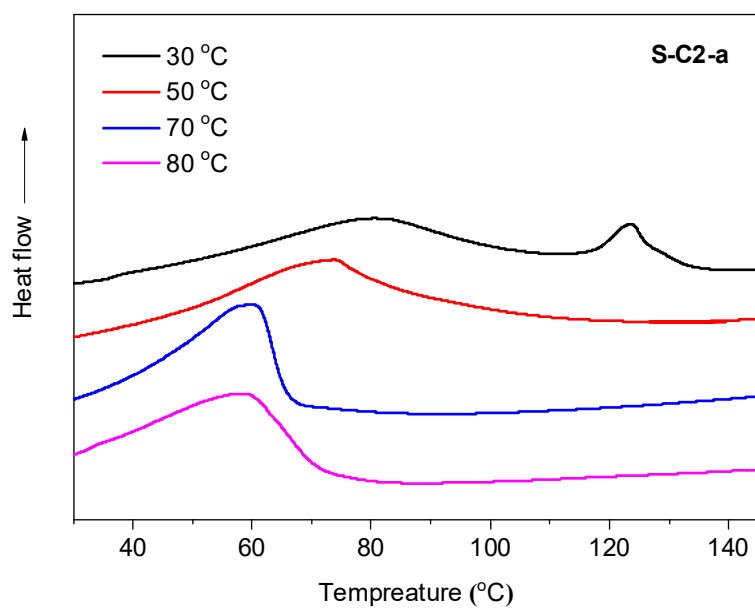

**Figure S5. DSC curves of polyethylene obtained with S-C2-a (Entries 8-11 in Table 3)**

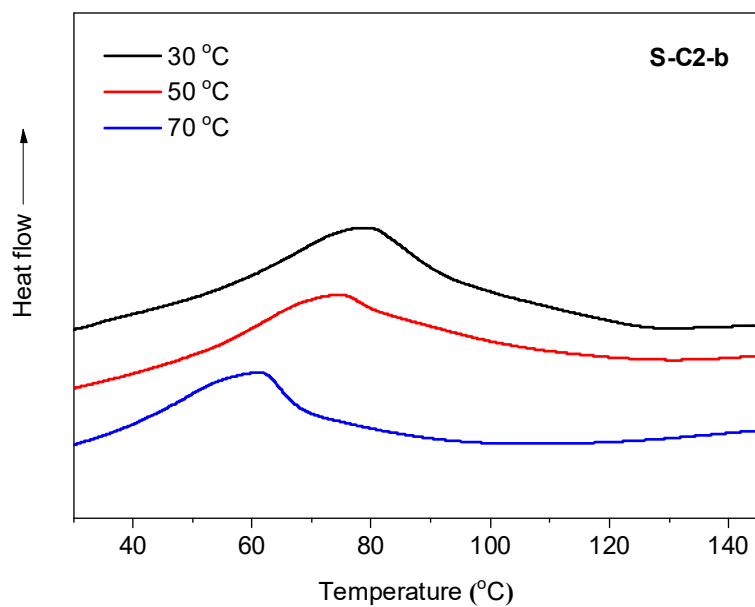

**Figure S6. DSC curves of polyethylene obtained with S-C2-b (Entries 12-14 in Table 3)**

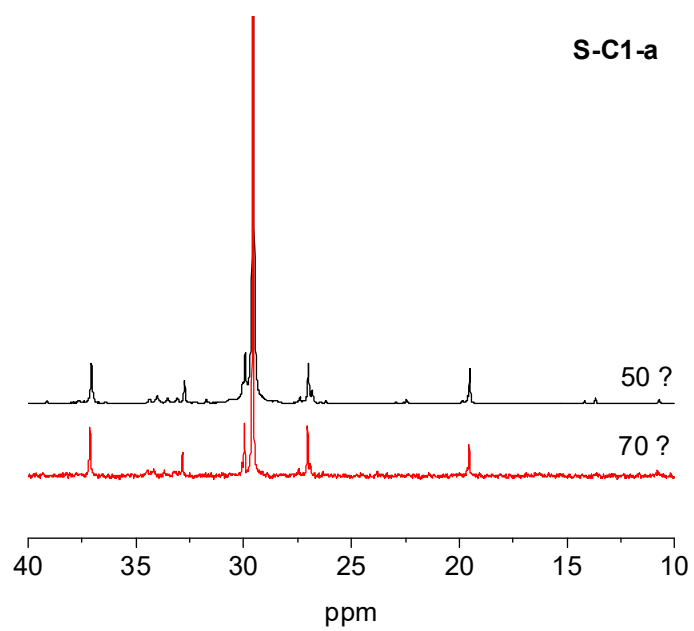

**Figure S7.  $^{13}\text{C}$  NMR spectra of polyethylenes (Entries 2, 3 in Table 2).**

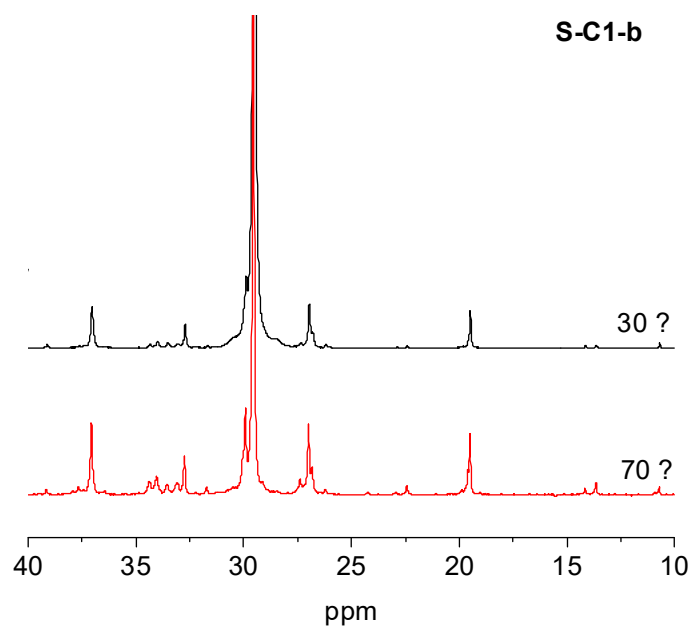

**Figure S8.  $^{13}\text{C}$  NMR spectra of polyethylenes (Entries 5, 7 in Table 2).**

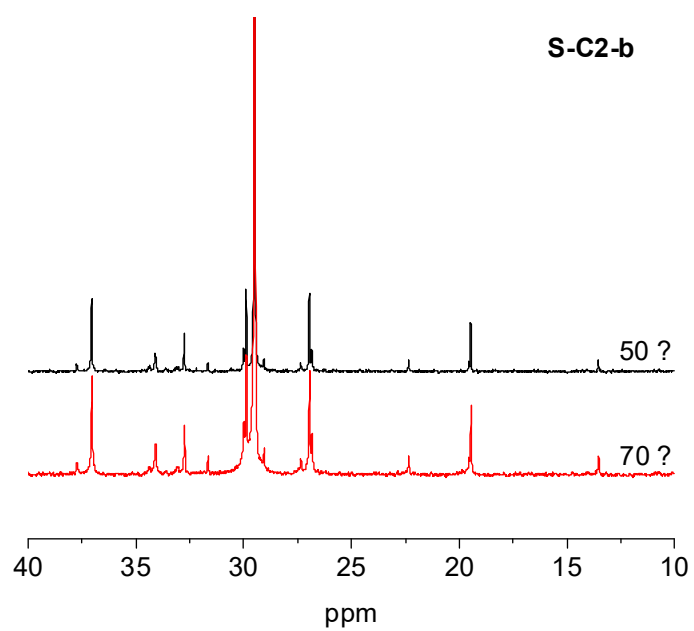

**Figure S9.  $^{13}\text{C}$  NMR spectra of polyethylenes (Entries 13, 14 in Table 3).**
